# Supplementary material for: High-sensitivity and self-driven photodetectors based on Ge–CdS core–shell heterojunction nanowires via atomic layer deposition
Source: Royal Society of Chemistry journal article supplement (doi:10.1039/c6ce00576d), 2016-01-01
Supplement: c6ce00576d1.pdf [file c6ce00576d1.pdf]

## **Electronic Supplementary Information**

# **High-Sensitivity and Self-Driven Photodetectors based on Ge-CdS Core-Shell Heterojunction Nanowires via Atomic Layer Deposition**

*Zheng Sun, Zhibin Shao,\* Xiaofeng Wu, Tianhao Jiang, Ni Zheng and Jiansheng Jie\**

Institute of Functional Nano & Soft Materials (FUNSOM), Collaborative Innovation  
Center of Suzhou Nano Science and Technology, Jiangsu Key Laboratory for Carbon-  
Based Functional Materials & Devices, Soochow University, Suzhou, Jiangsu 215123,  
P. R. China.

E-mail: zbshao@suda.edu.cn, jsjie@suda.edu.cn

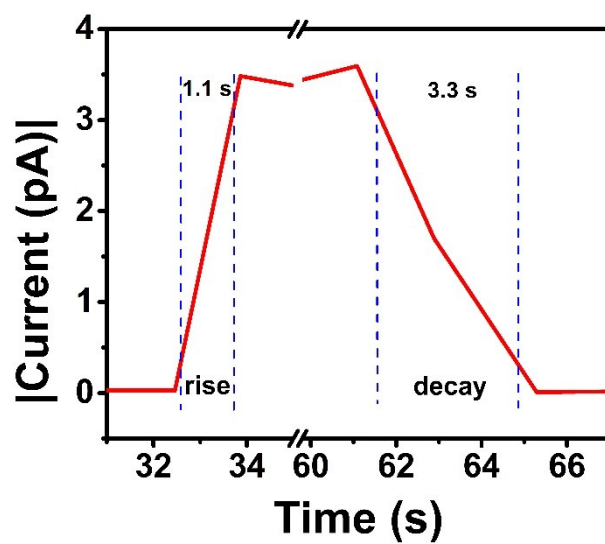

**Figure S1.** Enlarged rise and decay edges of the temporal photoresponse under the illumination of pulsed light at zero bias voltage.
